# Supplementary material
Source: ML conference proceedings conference paper supplement (https://proceedings.neurips.cc/paper_files/paper/2022/hash/7283957fa5aa3bd79870ac8753f2f742-Abstract.html)
Supplement: Supplementary file 1 [file 7283957fa5aa3bd79870ac8753f2f742-Supplemental-Conference.zip]

Archive with 3 entries (2 files):
- VisCo_sup/
- VisCo_sup/VisCo_sup.pdf
- __MACOSX/VisCo_sup/._VisCo_sup.pdf
